# Supplementary material for: FEBID 3D-Nanoprinting at Low Substrate Temperatures: Pushing the Speed While Keeping the Quality
Source: MDPI journal article supplement (doi:10.3390/nano11061527), 2021-06-09
Supplement: s1 [file s1]

# Supplementary Material

## FEBID 3D-Nanoprinting at Low Substrate Temperatures: Pushing the Speed While Keeping the Quality

Jakob Hinum-Wagner<sup>1</sup>, David Kuhness<sup>1</sup>, Gerald Kothleitner<sup>2,3</sup>, Robert Winkler<sup>1\*</sup> and Harald Plank<sup>1,2,3\*</sup>

<sup>1</sup> Christian Doppler Laboratory for Direct-Write Fabrication of 3D Nano-Probes (DEFINE), Institute of Electron Microscopy, Graz University of Technology, Steyrergasse 17, 8010 Graz, Austria; jakob.hinum@felmi-zfe.at (J.H.-W.); david.kuhness@felmi-zfe.at (D.K.)

<sup>2</sup> Institute of Electron Microscopy and Nanoanalysis, Graz University of Technology, Steyrergasse 17, 8010 Graz, Austria; gerald.kothleitner@felmi-zfe.at

<sup>3</sup> Graz Centre for Electron Microscopy, Steyrergasse 17, 8010 Graz, Austria

\* Correspondence: robert.winkler@felmi-zfe.at (R.W.); harald.plank@felmi-zfe.at (H.P.)

### 1. Supplement 1: Exact Fabrication Temperatures

In this study, we target substrate temperatures  $T_s$  of 5 °C, 10 °C, 15 °C, 20 °C, 25 °C and 30 °C. Depending on the cooling/heating history of each experiment (within a experimental set, dwell times (DT) were kept constant) the actual temperature stabilizes at slightly different values, which are shown in Table S1. For a concise presentation in the figures, we used the categorization in 5 °C steps throughout the manuscript instead of the exact temperatures shown here.

**Table S1.** Exact substrate temperatures for each experiment. For each experimental run, the same DTs were used, whereby exact  $T_s$  were measured by a Pt1000 sensor. These values deviate slightly from the nominal temperatures. The standard deviation for the sensor data is a maximum of  $\pm 0.4$  °C.

| dwell time (ms) | nominal temperatures |            |            |            |            |            |
|-----------------|----------------------|------------|------------|------------|------------|------------|
|                 | 5 °C (°C)            | 10 °C (°C) | 15 °C (°C) | 20 °C (°C) | 25 °C (°C) | 30 °C (°C) |
| 3               | 5.4                  | 10.8       | 15.8       | 20.2       | 24.8       | 28.6       |
| 5               | 5.3                  | 10.4       | 15.8       | 19.8       | 24.3       | 28.4       |
| 10              | 5.4                  | 10.6       | 16.0       | 19.8       | 24.5       | 28.7       |
| 15              | 5.4                  | 10.9       | 15.9       | 20.0       | 24.8       | 28.6       |
| 20              | 5.5                  | 11.1       | 15.9       | 20.1       | 24.8       | 28.8       |
| 25              | 5.7                  | 11.3       | 16.4       | 20.1       | 25.0       | 28.9       |
| 30              | 5.5                  | 11.0       | 15.9       | 19.7       | 24.3       | 28.8       |

### 2. Supplement 2: Evaluation of Temperature Limits

In the following we rationalize the temperature limits for the main study via dedicated experiments. At elevated  $T_s$  a worsening of the growth rate is anticipated, we nevertheless selected a  $T_s$  of 30 °C as upper limit to demonstrate the implications on 3D-FEBID structures also above room temperature. To determine the minimum temperature, we evaluate precursor condensation effects upon very slow substrate cooling (cooling rate 0.2 °C/s). SEM images are taken every two seconds, which results in a temperature resolution of 0.4 °C. The GIS nozzle was injected (distance to substrate 100  $\mu$ m) and the gas flow was active during the entire cooling process. Figure S 1 shows selected pictures of this image set. At  $-1.8$  °C condensation of precursor is visible in front of the GIS nozzle (Figure S 1a). The condensation area increases when reducing the temperature. For Figure

S 1f, the GIS nozzle has been retracted, which reveals a circular shape of the condensate. Figure S 2 shows the subsequent evaporation process while the substrate is reheated with a temperature rate of 1 °C/s. The evaporation process is completed around 14 °C, where the condensate was brought completely to the gas phase.

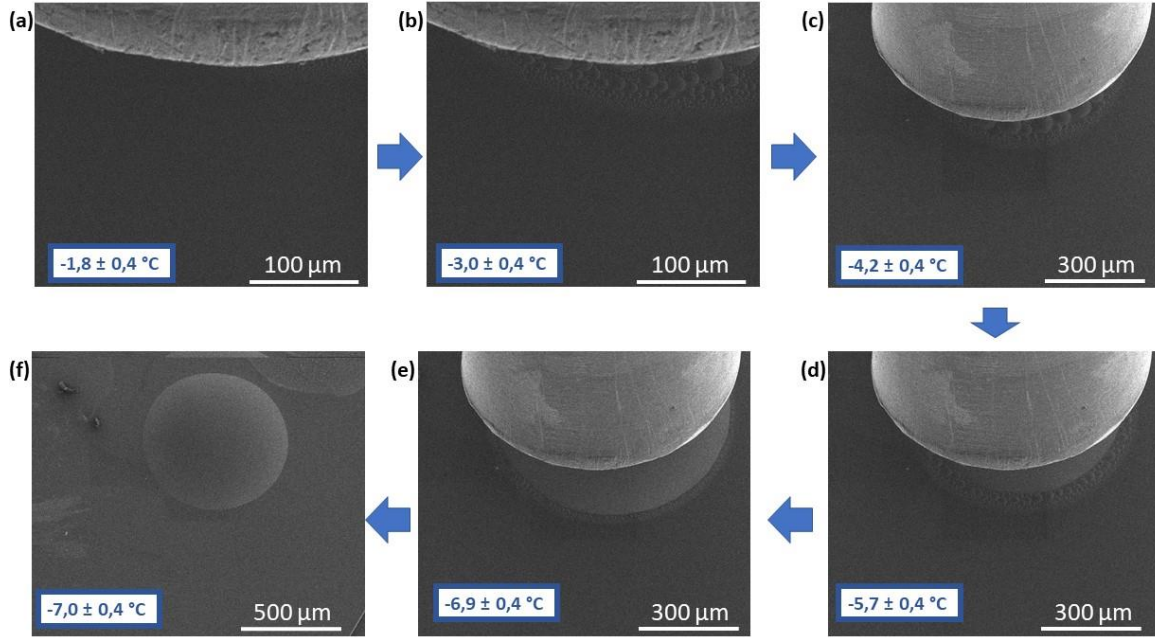

**Figure S1.** Precursor condensates during substrate cooling at temperatures below 0 °C (a-f). The gas injection nozzle is visible at the top of each SEM image in (a-e).

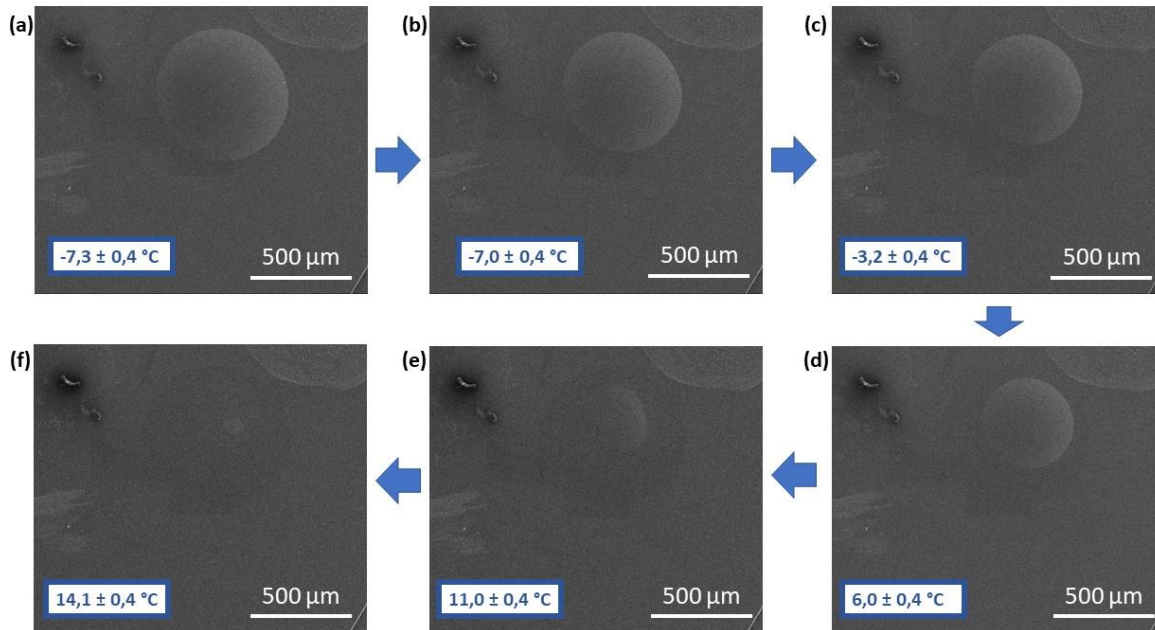

**Figure S2.** Evaporation of the precursor condensate when increasing the  $T_s$  from  $-7,3$  °C to  $14,1$  °C.(a-f).

This experiments reveal, that for the here used Platinum precursor,  $T_s$  below 0 °C should be avoided. To assure reliable conditions we have selected 5 °C for the experiments in the main manuscript. This temperature limit minimizes the possibility of droplet

formation, avoids hysteresis effects during reheating as evident in Figure S 2, and allows to stabilize the  $T_s$  for the duration of the experiments. Please note, the Peltier cooling stage is capable for experiments below  $0^\circ\text{C}$ , which might be interesting for other precursors materials in future studies.

### 3. Supplement 3: Thickness and Width for Tetra- and Pentapods

Figure S 3 shows widths and thickness of tetrapods and pentapods, respectively, all fabricated at constant DTs of  $15\text{ ms}$ . Compared to the measurements on tripods (Figure 2a,b in the main manuscript) wire dimensions increase with the number of legs, e.g. for  $5^\circ\text{C}$ :  $55\text{ nm}$  (tripod)  $\rightarrow 63\text{ nm}$  (tetrapod)  $\rightarrow 73\text{ nm}$  (pentapod).

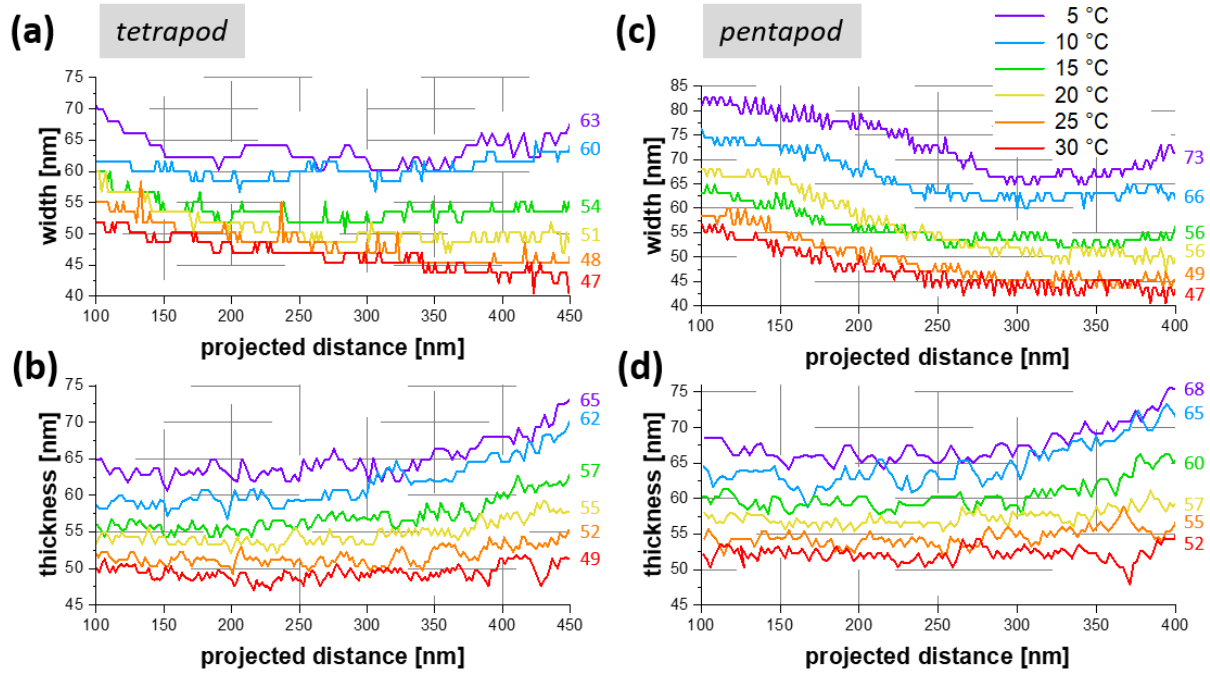

**Figure S3.** Width and thickness evolution for tetra- and pentapods. Width (a,c) and thickness (b,d) measurements on tetrapod and pentapod legs, respectively, fabricated with a dwell time of  $15\text{ ms}$  at varying  $T_s$ . The legend in (c) applies to all graphs, the colored numbers next to each curve corresponds to the mean width/thickness in the shown region. Take-off and merging zones are excluded from the measurements.

#### 4. Supplement 4: Absolute Volume Growth Rates

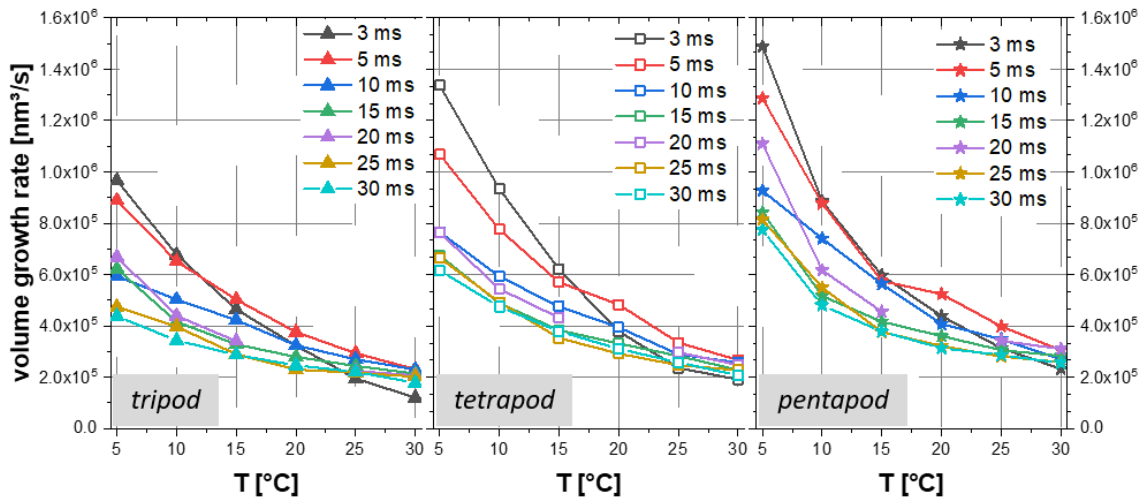

**Figure S4.** Volume growth rates for multipod structures as function of the  $T_S$  for different dwell time settings.

Figure S 4 shows three trends: (1) Volume growth rate (VGR) is strongly enhanced at lower  $T_S$ , (2) VGR increases with the number of legs and (3) VGR variations get larger for lower DTs. In agreement with the discussion section in the main manuscript, highest VGR (= deposition rate) is obtained at lowest  $T_S$ , low DT and longest refresh times.

#### 5. Supplement 5: Shape Fidelity of Tetra- and Pentapods

Figure 4a in the main manuscript has demonstrated the excellent shape fidelity of tripods of similar heights fabricated at various  $T_S$ . Figure S 5 shows that this high shape quality is also valid for tetrapods and pentapods.

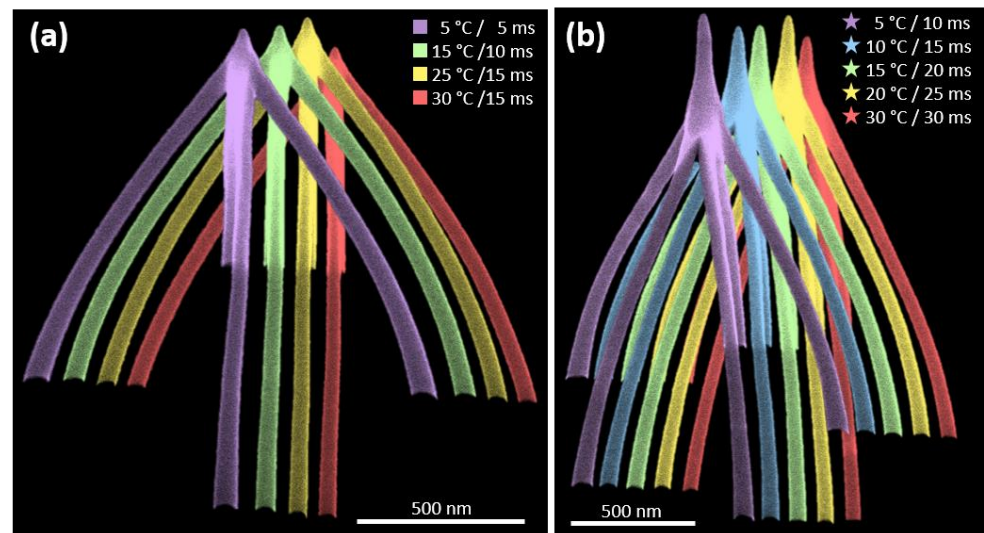

**Figure S5.** Tetrapods (a) and pentapods (b) of similar heights fabricated at different  $T_S$  and DT settings.

## 6. Supplement 6: Curvatures of Tetra- and Pentapods

Complementing the tripod data in Figure 4b in the main manuscript, Figure S 6 shows the curvatures and the corresponding fit curves for tetra- and pentapods.

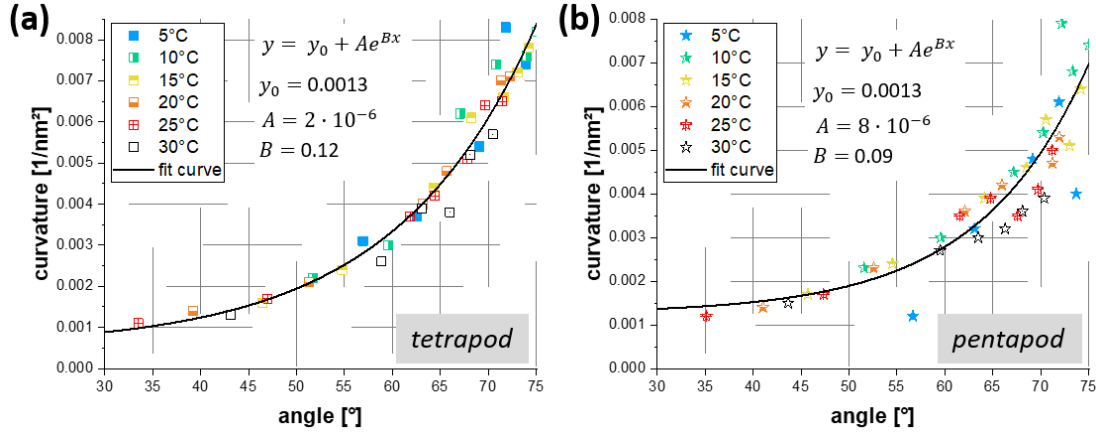

**Figure S6.** Curvature of tetrapod (a) and pentapod (b) branches as a function of the segment angle. The solid black lines represent an exponential fit for all temperatures down to 10 °C, the fit parameters are given in each graph.

## 7. Supplement 7: Calculation of Temperatures at the Growth Front

The temperature at the growth front  $T_{BIR}$  can be calculated by

$$T_{BIR} = T_S + R_{th} \frac{dQ}{dt}$$

with the thermal resistance  $R_{th}$ , and the beam heating rate  $\frac{dQ}{dt}$  [1].

The thermal resistance of a single leg is given by  $R_{th,leg} = \frac{L}{\lambda A}$  with thermal conductivity  $\lambda$ , the segment length  $L$ , and wire cross-sectional area  $A$ . Values for  $L$  and  $A$  are measured from SEM images, the cross-section area  $A$  was approximated by an ellipse. For thermal conductivity  $\lambda$  we used  $0.24 \text{ W/(mK)}$  as reported for 5 keV with similar beam currents by Fowlkes in [2]. The overall multipod thermal resistance  $R_{th}$  shown in Figure S 7a can be considered as parallel circuit of single leg resistances  $R_{th,leg}$  (see Figure 6a-c top right). The higher the number of legs, the lower is the value of  $R_{th}$ . Although  $L$  increases for lower  $T_S$  for a given DT, lower values of  $R_{th}$  are found, which is caused by the larger wire widths and thicknesses at low temperatures (see Figure 2 in the main manuscript).

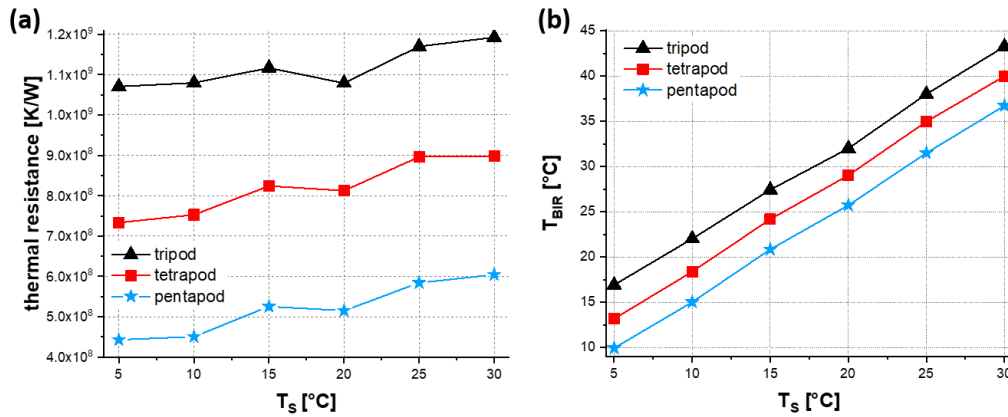

**Figure S7.** (a) Thermal resistance of multipod structures and (b) temperatures at the pillar growth front as function of the substrate temperature  $T_S$ .

During pillar growth on the multipod, heat is generated, which is described by the beam heating rate  $\frac{dQ}{dt}$ . For the given beam parameters (5 keV/28 pA), we extracted a value of  $1.11 \times 10^{-8}$  W for  $\frac{dQ}{dt}$  from simulations reported in [2], validated by complementary experiments. This allows to estimate the temperature at the growth front of a starting pillar on top of a multipod as shown in Figure S 7b.  $T_{BIR}$  is about 5 °C, 8 °C, and 12 °C higher than  $T_s$  for penta-, tetra-, and tripods, respectively. Please note, we here neglect the evolution of  $T_{BIR}$  along the vertical pillar, which is expected to be comparable small for the observed pillar heights.

## 8. Supplement 8: Calculation of Mean Residence Times

If  $T_{BIR}$  is known, one can calculate the mean residence time  $\tau$

$$\tau(T) = \frac{1}{k_0} e^{\frac{E_a}{k_B T}}$$

with the estimated pre-exponential attempt frequency  $k_0$  ( $1 \times 10^{13}$  Hz, [1]) and the activation energy for surface desorption for the MeCpPt<sup>IV</sup>Me<sub>3</sub>-PtC<sub>x</sub> interface  $E_a$  (0.62 eV, [1]). Figure S 8a shows the strong increase in mean precursor residence time when the  $T_s$  is reduced. Furthermore, the effects of the number of legs on the mean residence time of precursor molecules become apparent, especially at low  $T_s$ . Figure S 8b compares the vertical pillar growth rates with the respective the residence times. Please note that we only consider desorption effects here, while other temperature-dependent aspects (diffusion, sticking, dissociation) are neglected.

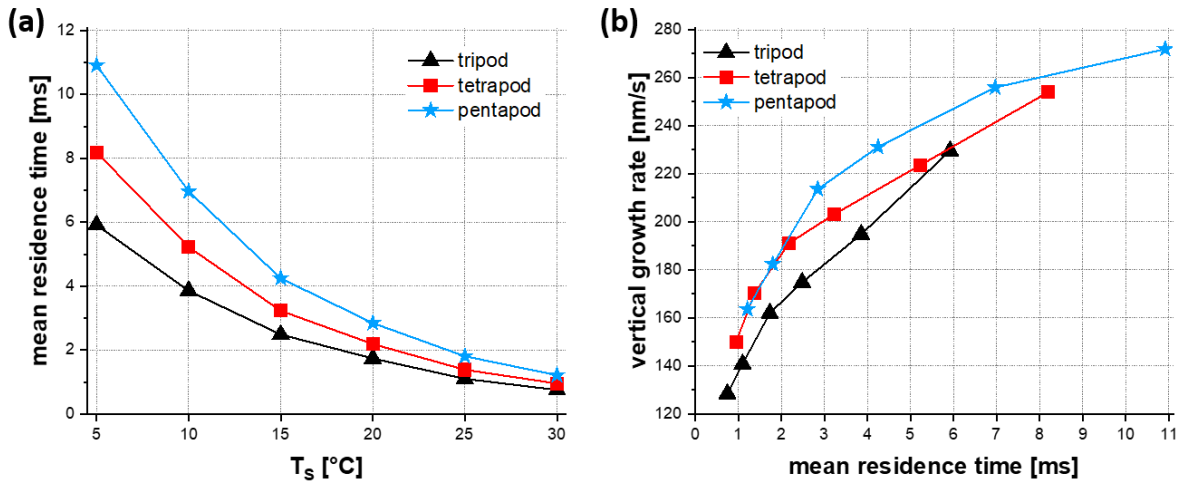

**Figure S8.** (a) mean residence time of precursor molecules at the pillar growth front. (b) experimental found vertical growth rate as a function of the mean residence time.

---

## References

- [1] E. Mutunga, R. Winkler, J. Sattelkow, P.D. Rack, H. Plank, J.D. Fowlkes, Impact of Electron-Beam Heating during 3D Nanoprinting, *ACS Nano*. 13 (2019) 5198–5213. <https://doi.org/10.1021/acsnano.8b09341>.
- [2] R. Winkler, J.D. Fowlkes, P.D. Rack, G. Kothleitner, H. Plank, Shape Evolution and Growth Mechanisms of 3D-printed Nanowires, *Addit. Manuf.* (2021). In press. <https://doi.org/10.1016/j.addma.2021.102076>
